# Supplementary material for: Accuracy of the Scalar Magnetometer aboard ESA's JUICE Mission
Source: Copernicus journal article supplement (doi:10.5194/egusphere-2023-3073), 2024-01-08
Supplement: Supplementary file [file egusphere-2023-3073-RC1-supplement.pdf]

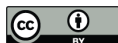

# Accuracy of the Scalar Magnetometer aboard ESA's JUICE Mission

Christoph Amtmann<sup>1</sup>, Andreas Pollinger<sup>2</sup>, Michaela Ellmeier<sup>1,2</sup>, Michele Dougherty<sup>3</sup>, Patrick Brown<sup>3</sup>, Roland Lammegger<sup>1</sup>, Alexander Betzler<sup>1,2</sup>, Martín Agú<sup>2,†</sup>, Christian Hagen<sup>2,†</sup>, Irmgard Jernej<sup>2</sup>, Josef Wilfinger<sup>2</sup>, Richard Baughen<sup>3</sup>, Alex Strickland<sup>3</sup>, and Werner Magnes<sup>2</sup>

<sup>1</sup>Institute of Experimental Physics, Graz University of Technology, Petersgasse 16, 8010 Graz, Austria

<sup>2</sup>Space Research Institute, Austrian Academy of Sciences, 8042 Graz, Austria

<sup>3</sup>Blackett Laboratory, Imperial College London, London, United Kingdom SW7 2BW

<sup>†</sup>deceased

**Correspondence:** Christoph Amtmann (christoph.amtmann@tugraz.at)

**Abstract.** The paper discusses the accuracy of the scalar Coupled Dark State Magnetometer on board the Jupiter Icy Moon Explorer (JUICE) mission of the European Space Agency. The scalar magnetometer, referred to as MAGSCA, is part of the J-MAG instrument.

MAGSCA is an optical, omni-directional scalar magnetometer based on coherent population trapping, a quantum interference effect, within the hyperfine manifold of the <sup>87</sup>Rb D<sub>1</sub> line. The measurement principle is only based on natural constants and therefore, it is in principle drift free and no calibration is required. However, the technical realisation can influence the measurement accuracy. The most dominating effects are heading characteristics, which are deviations of the magnetic field strength measurements from the ambient magnetic field strength.

The verification of the accuracy and precision of the instrument is required to ensure its compliance with the performance requirement of the mission: 0.2 nT (1- $\sigma$ ). The verification is carried out with four dedicated sensor orientations in a Merritt coil system, which is located in the geomagnetic Conrad observatory. The coil system is used to compensate the Earth's magnetic field and to apply appropriate test fields to the sensor.

This paper presents a novel method to separate the heading characteristics of the instrument from residual (offset) fields within the coil system by fitting a mathematical model to the measured data. It allows verifying that the MAGSCA sensor unit does not have a measurable remanent magnetisation as well as that the desired accuracy of 0.2 nT (1- $\sigma$ ) is achieved by the MAGSCA flight hardware for the JUICE Mission.

## 1 Introduction

The Jupiter Icy Moons Explorer (JUICE) mission of the European Space Agency aims to explore the Jovian system and its icy Galilean moons Ganymede, Callisto and Europa in terms of their potentially habitable environments (Grasset et al., 2013; Tea, 2014). The JUICE satellite was launched on the 14<sup>th</sup> of April 2023 and is expected to arrive at the Jupiter system in July 2031.

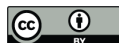

The on-board magnetometer J-MAG consists of three sensors – one built at Imperial College London, one built at the Technische Universität Braunschweig, Germany, and one built at the Austrian Academy of Sciences in partnership with Graz University of Technology, Austria (Report, 2014). The Imperial and Braunschweig instruments are ‘fluxgate’ sensors, which measure the direction and strength of magnetic fields. Fluxgate sensors are used very successfully for space applications (Auster, 2008; Acuña, 2002). However, fluxgate sensors require regular in-flight calibration due to thermally induced off-set drifts and long term instabilities (Merayo et al., 2000; Ripka, 2003). The magnetic environment around Ganymede is so dynamic that traditional calibration techniques for fluxgates – such as rolling the spacecraft at Ganymede – will not work. Therefore, a new calibration method was needed using the field strengths, accurately measured by the scalar sensor MAGSCA. The scalar magnetometer acts as the reference magnetometer since its measurement principle is intrinsically drift free and no calibration is required.

All sensors are mounted on the magnetometer boom which has a length of 10.6 m in deployed configuration with MAGSCA at the tip (Arce and Rodriguez, 2019).

J-MAG plays a key role in the exploration of Ganymede’s subsurface oceans and its active magnetic dynamo. The expected magnetic field strengths in the orbit around Ganymede are in the range from 300 nT to 1500 nT. Thus, the accuracy and precision of the magnetic field strength measurement is of high importance. For the JUICE mission, the required accuracy for MAGSCA was defined as 0.2 nT (1- $\sigma$ ).

### 1.1 Coupled Dark State Magnetometer

The Coupled Dark State Magnetometer is an all-optical scalar magnetometer based on the quantum mechanical interference effect of coherent population trapping (CPT) (Arimondo, 1996; Vanier et al., 1998) in the atomic vapour of the rubidium isotope <sup>87</sup>Rb. The instrument has been developed since 2008 (Lammegger, 2008) in a cooperation of the Institute of Experimental Physics of Graz University of Technology and the Space Research Institute of the Austria Academy of Sciences.

The working principle is based on the accurate measurement of the so-called Zeeman shifts (Wynands and Nagel, 1999). The Zeeman effect describes the shift of atomic energy states by an ambient magnetic field.

Figure 1 depicts CPT resonances, within the hyperfine structure of the <sup>87</sup>Rb D<sub>1</sub> line (Steck, 2003), which are utilised by the instrument. The coloured arrows represent atomic excitations, induced by light fields, emitted by the instrument’s laser diode. Two coherent excitations starting from two ground states to a common upper state - forming a  $\Lambda$ -system - are required to establish a CPT resonance.

The bias current of the instrument’s laser diode is modulated to create a multi-frequency modulated laser light field (Bjorklund et al., 1983; Amtmann et al., 2023) which is used to couple several CPT resonances within the rubidium vapour. This coupling enables a differential measurement principle to increase the instrument’s accuracy. The detection frequency, which is used for measuring the Zeeman shift, is derived from the excitation of the clock transition within the <sup>87</sup>Rb D<sub>1</sub> line (Pollinger et al., 2018). This results in a low error of the detection frequency, translating to a magnetic field strength error of < 0.001 nT.

The strengths of the individual atomic excitations depend on the angle between the magnetic field vector and the laser propagation direction (Vanier and Audoin, 1989), the so-called sensor angle  $\beta$ . As a consequence, two different sets of CPT

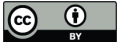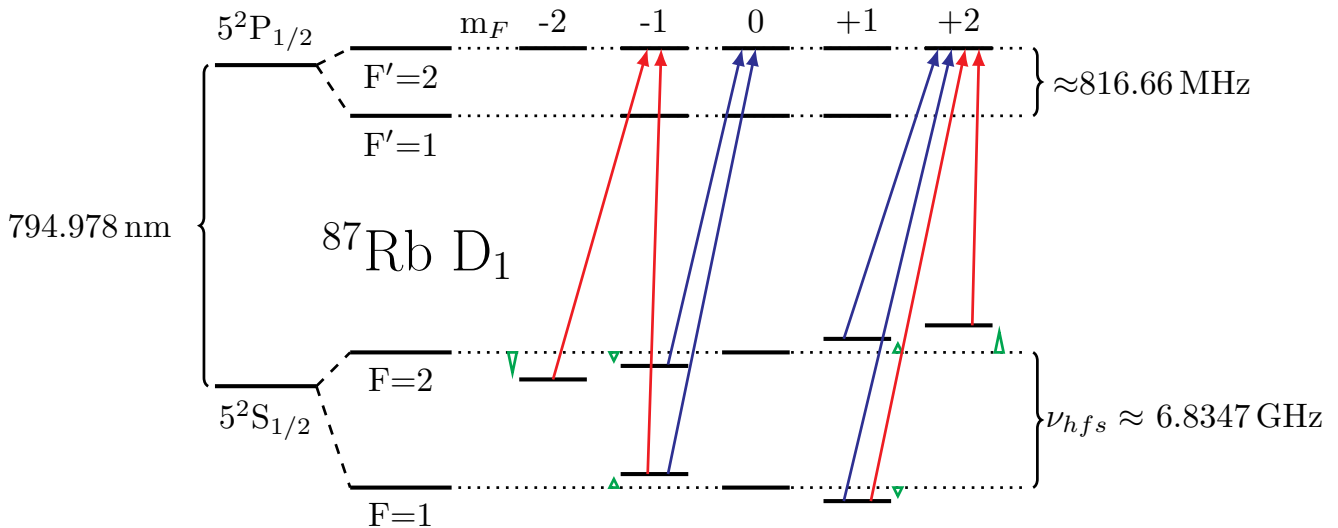

**Figure 1.** Hyperfine structure of the  $^{87}\text{Rb}$   $D_1$  line. The ambient magnetic field strength shifts the atomic energy states according to their  $m_F$  quantum number (Steck, 2003). Two coherent excitations starting from two ground states to a common upper state - forming a  $\Lambda$ -system - are required to establish a CPT resonance. MAGSCA measures the Zeeman shifts of the ground states ( $F = 1$  and  $F = 2$ ) by establishing the red and blue  $\Lambda$ -systems. Thus, the Zeeman shifts are only depicted for the ground states and are indicated by the green triangles.

resonances have to be used to cover the entire angular range and to enable the instrument's omni-directionality (Pollinger et al., 2012). The blue  $\Lambda$ -systems (Fig. 1) are coupled to form the  $n_2$  coupled CPT resonance to measure the magnetic field strength at the sensor angular ranges of  $0^\circ$  to  $60^\circ$ ,  $120^\circ$  to  $240^\circ$  and  $270^\circ$  to  $360^\circ$ . For the complementary angular ranges ( $60^\circ$  to  $120^\circ$  and  $240^\circ$  to  $270^\circ$ ), the red  $\Lambda$ -systems are coupled to form the  $n_3$  coupled CPT resonance. For the instrument operation, the default angles for switching between the two sets is a multiple of  $60^\circ$ .

The magnetic field strength is derived from the difference frequency of a set of coupled CPT resonances (e.g. blue or red set in Fig. 1) by using the Breit-Rabi formula (Steck, 2003). Due to the differential measurement, all even power coefficients in a Taylor series representation of the Breit-Rabi formula vanish. The consequence is a highly linear characteristic of the magnetic field strength frequency. The power series coefficients corresponding to  $B^3$  are  $-2.212 \cdot 10^{-16} \text{ Hz nT}^{-3}$  for  $n_2$  (blue set) versus  $-2.876 \cdot 10^{-16} \text{ Hz nT}^{-3}$  for  $n_3$  (red set). At  $B = 2000 \text{ nT}$ , frequency deviations from the linear characteristic of  $-1.770 \text{ } \mu\text{Hz}$  ( $n_2$ ) and  $-2.301 \text{ } \mu\text{Hz}$  ( $n_3$ ) are found. Both are well below the frequency resolution (1 mHz) of the instrument.

Not only the magnetic field, but also other effects, e.g., light shifts (Levi et al., 2000) can alter the atomic energy states. Under certain conditions, these are indistinguishable from Zeeman shifts (Amtmann, 2022). These effects are considered by the so-called heading characteristics, which are sensor angle dependent absolute errors and define the accuracy of the instrument.

Figure 2 depicts an example of heading characteristics for the  $n_2$  and  $n_3$  coupled CPT resonances. Additionally, a residual magnetisation of the sensor unit can impact the accuracy.

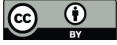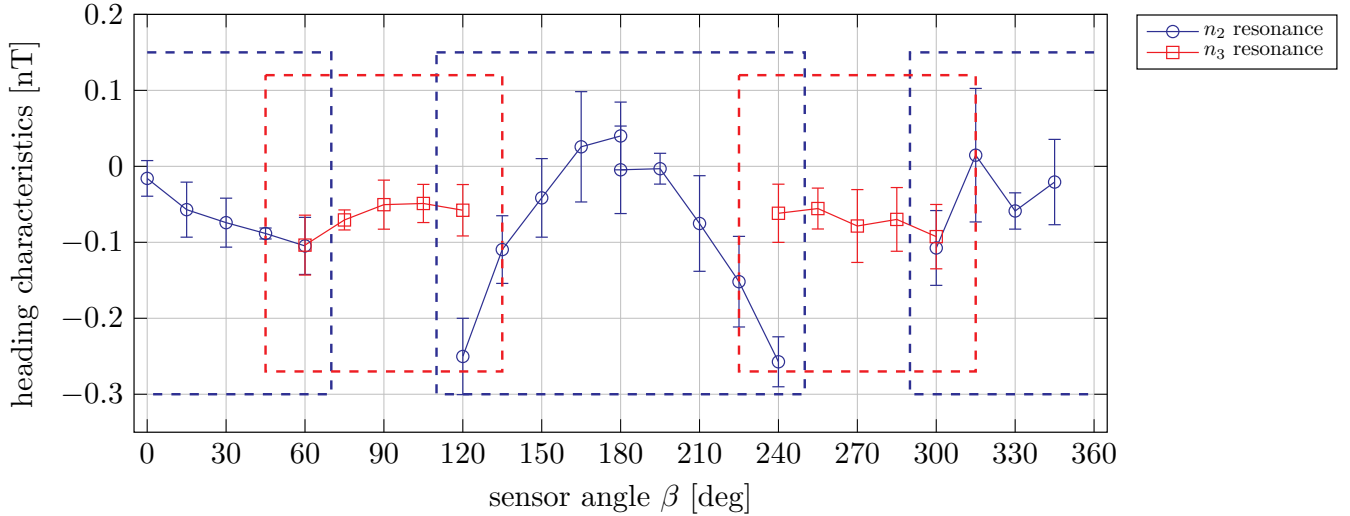

**Figure 2.** Exemplary heading characteristics for the  $n_2$  and  $n_3$  coupled CPT resonances, which are sensor angle dependent absolute errors as a function of the sensor angle  $\beta$ . The angle  $\beta$  is the angle between the optical axis of the sensor unit and the magnetic field vector. MAGSCA can measure the magnetic field strength in the entire  $360^\circ$  angular range by switching between both resonances. **For the angular ranges, where both coloured boxes overlap, an operation with both resonances is possible.** Measurement setup: MAGSCA stand-alone (Sect. 2), with laser bias current 2.14 mA and vapour cell temperature  $25^\circ\text{C}$ .

In 2018, the Coupled Dark State Magnetometer was launched to space for the first time on board the China Seismo-Electromagnetic Satellite (CSES) (Pollinger et al., 2018, 2020).

Figure 3 shows the MAGSCA flight model for the JUICE mission. The instrument's main components are the electronics box, the optical fibres and the sensor unit. The laser unit, within the electronics box, is connected by an optical fibre to the sensor unit. The sensor unit houses a glass cell, containing the rubidium vapour. Here, the laser light probes the interaction of the magnetic field with the rubidium atoms. A second optical fibre guides the laser light back to the photo diode, mounted within the electronics box. A Field Programmable Gate Array (FPGA) is responsible for signal generation as well as signal analysis (Pollinger et al., 2010).

For the JUICE mission, a new sensor unit was developed which features a dual laser beam pass of the vapour cell. Compared to the previous sensor unit, developed for the CSES mission, the new sensor unit increases the accuracy and precision of the instrument (Ellmeier et al., 2023; Amtmann, 2022).

## 1.2 Accuracy and Precision

The accuracy and the precision of the magnetic field strength measurement are important for any kind of reference magnetometer. The accuracy of the instrument corresponds to the absolute error,

$$AE(\beta) = B(\beta) - B_0 \quad , \quad (1)$$

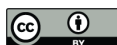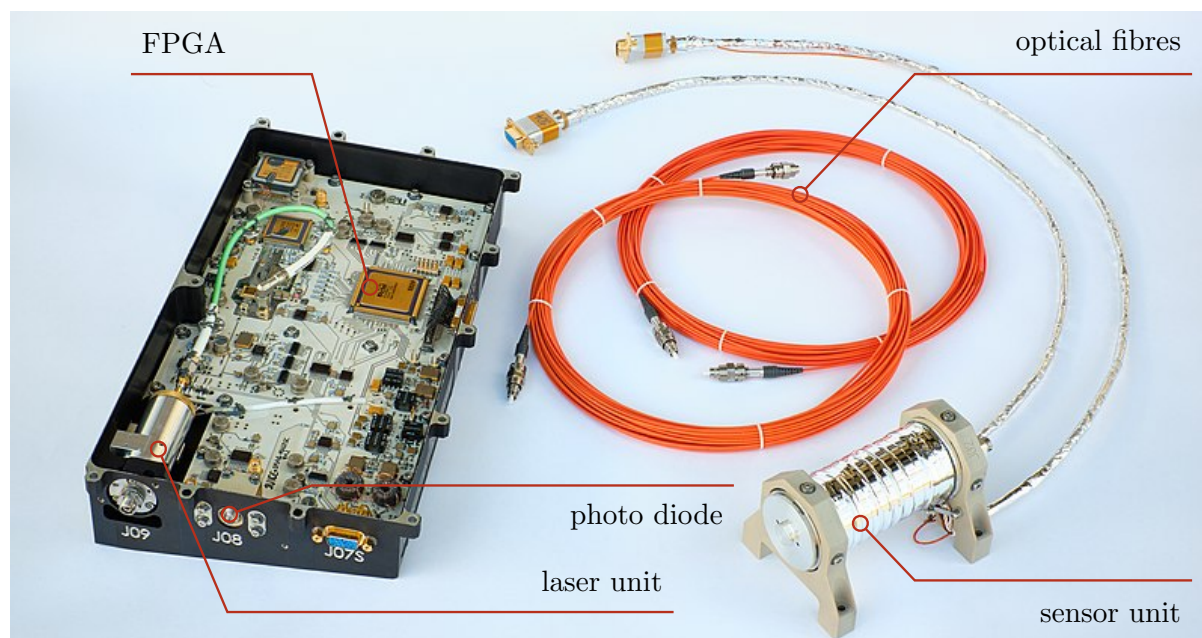

**Figure 3.** The flight model for MAGSCA. The main components are labelled. ©MAGSCA Team / A. Pollinger / <https://w.wiki/3CHQ> / CC BY 4.0.

which is the deviation of the mean magnetic field strength measurement  $B(\beta)$ , averaged over a certain measurement time, from the true magnetic field strength  $B_0$ . Due to the instrument's heading characteristics, the absolute error is a function of the sensor angle  $\beta$ . The precision  $P(\beta)$  is the standard deviation of the mean magnetic field strength measurement  $B(\beta)$  and thus, the precision also can be dependent on the sensor angle  $\beta$ .

In order to get the most accurate magnetic field strength data, the instrument's measurements have to be corrected for the heading characteristics. The exemplary heading characteristics (Fig. 2) show, that the deviations of the measurements depend on the selected coupled CPT resonance ( $n_2$  or  $n_3$ ).

Additionally, the sensor angular behaviour of the heading characteristic as well as the magnitude of the heading characteristic are dependent on the operational parameters of MAGSCA. Parameters like laser bias current (and therewith linked modulation index and laser light intensity (Amtmann et al., 2023)) and the rubidium vapour temperature influence the heading characteristics (Amtmann, 2022). The impact of different laser bias currents is shown in Fig. 4. For a proper correction of the magnetic field strength measurement, the heading characteristics have to be known for each set of operational parameters.

During the long time in space, the instrument's optical components will experience radiation induced attenuation. To counteract this, the instrument will be operated at higher laser bias currents and at higher sensor temperatures. Thus, the performance of the instrument has to be understood for these operational parameters.

During the main Ganymede science phase, JUICE will start to orbit the Jovian moon along a circular orbit with an altitude of 500 km and will finish at 200 km. The measurements along several orbits will be taken for the in-flight calibration of the

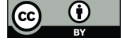

fluxgate sensors, which is based on MAGSCA data. During such a calibration sequence, it can be considered that MAGSCA  
105 measures the field strengths with an almost uniformly distributed sensor angle.

In order to quantify and compare different heading characteristics (measured at different operational parameters), the sensor angular averaged accuracy  $\overline{AE}$  and angular averaged precision  $\overline{P}$  are introduced. They can be interpreted as averaging along a calibration sequence which includes measurements at all sensor angles.

The angular averaged accuracy  $\overline{AE}$  is defined as

$$110 \quad \overline{AE} = \overline{B} - B_0 \quad . \quad (2)$$

It describes the deviation of the angular averaged magnetic field strength measurement  $\overline{B}$  from the true magnetic field strength  $B_0$ . The angular average of the magnetic field strength measurement is

$$\overline{B} = \sum_{i=1}^n \frac{B_i(\beta)}{n} \quad , \quad (3)$$

determined for  $n$  measurements of  $B$  at  $n$  different angles. The angular averaged precision  $\overline{P}$  is calculated by computing the  
115 standard deviation for the  $n$  values of  $B_i(\beta)$ .

The heading characteristics have intrinsic angular behaviours, as shown in Fig. 2. Their magnetic field strength measurements, performed at evenly distributed sensor angles, do not reflect a normal distribution. Therefore,  $\overline{AE}$  and  $\overline{P}$  do not represent the underlying statistical nature. However, they can be used as indicators for comparison between individual heading characteristics, measured at different operational parameters, and they can be considered to represent the achievable accuracy of the  
120 J-MAG instrument during the mission.

To assess the measured heading characteristics in respect to the required accuracy for MAGSCA ( $\sigma_{req} = 0.2$  nT), an accuracy rating is introduced by Table 1. The rating considers the angular averaged accuracy  $\overline{AE}$ , the angular averaged precision  $\overline{P}$  as well as the sum of the two parameters  $\overline{AE} + \overline{P}$ .

For the rating of A, the angular averaged accuracy  $\overline{AE}$ , the angular averaged precision  $\overline{P}$  as well as their sum  $\overline{AE} + \overline{P}$  have to  
125 be within the required  $\sigma_{req}$  range. The sum ensures, that more than 68% of the measured values are within the  $\pm\sigma_{req}$  interval (if a normal distribution of the heading characteristics values is assumed). For the rating of B, the angular averaged accuracy  $\overline{AE}$  and the angular averaged precision  $\overline{P}$  are smaller than  $\sigma_{req}$ , while their sum  $\overline{AE} + \overline{P}$  exceeds the limit. For the rating of C, the angular averaged accuracy  $\overline{AE}$  is below the  $\sigma_{req}$  threshold, while the other requirements are larger than  $\sigma_{req}$ . For the rating of D, all three are larger than the required range.

130 The four ratings define the required post-processing of the measured data. For a set of operational parameters with rating A, no additional data correction is necessary. All requirements are below the 0.2 nT threshold. Rating B requires an  $\overline{AE}$  based offset correction of the data in order to bring the measurements within the  $\sigma_{req}$  range. As soon as the angular averaged precision is larger than  $\sigma_{req}$ , the heading characteristics have to be considered. For the ratings C and D, the complete data set has to be corrected by a function derived from the measured heading characteristics.

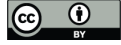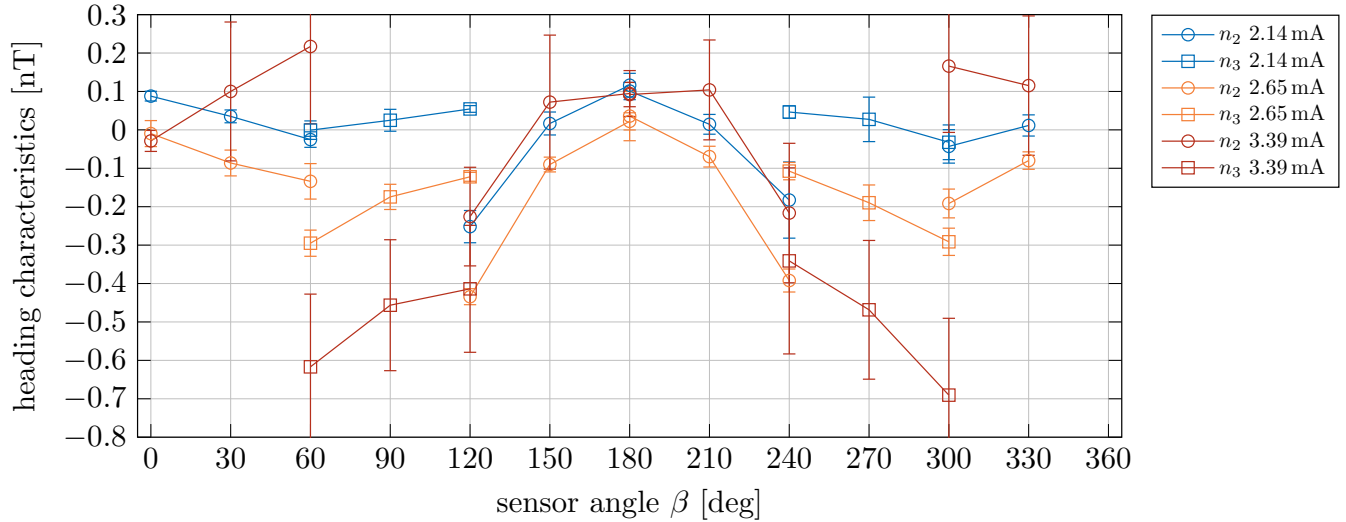

**Figure 4.** Impact of various laser bias currents on the heading characteristics. The magnitude as well as the angular behaviour is changed. Measured with the MAGSCA stand-alone setup (see Sect. 2) at a vapour temperature of 25°C. The presented data has larger error bars at the laser bias current of 3.39 mA which is mainly driven by the notable deviation of the residual field at the sensor position of 0° (Table 6).

**Table 1.** Requirements for the classification rating of the accuracy and precision of MAGSCA. The rating considers the angular averaged accuracy  $\overline{AE}$ , the angular averaged precision  $\overline{P}$  as well as the sum of the two parameters  $\overline{AE} + \overline{P}$ .

| Rating | $ \overline{AE} $ | $\overline{P}$ | $ \overline{AE}  + \overline{P}$ |
|--------|-------------------|----------------|----------------------------------|
| A      | $\leq 0.2$ nT     | $\leq 0.2$ nT  | $\leq 0.2$ nT                    |
| B      | $\leq 0.2$ nT     | $\leq 0.2$ nT  | $> 0.2$ nT                       |
| C      | $\leq 0.2$ nT     | $> 0.2$ nT     | $> 0.2$ nT                       |
| D      | $> 0.2$ nT        | $> 0.2$ nT     | $> 0.2$ nT                       |

## 135 2 Test Configuration

The verification of the accuracy and precision of MAGSCA was performed at the geomagnetic *Conrad Observatory (COBS)* of GeoSphere Austria in Lower Austria. This geomagnetic observatory features a magnetically clean and disturbance free measurement environment. For the verification tests, a Merritt coil system (*Ferronato BM4-3000-3-A*) was utilised, which allows characterising the accuracy of the MAGSCA sensor unit over the entire sensor angular range. The coil system is located in the facilities tunnel system which has a constant ambient temperature of about 6°C yearlong. This minimises thermal fluctuation experienced by the coils which, in turn, reduces variations in the generated magnetic field.

Figure 5 shows a picture of the double Merritt coil system, located at the magnetically clean environment of the COBS tunnels. It consists of two independent coil systems. The first one is used to compensate the Earth’s magnetic field (compensation

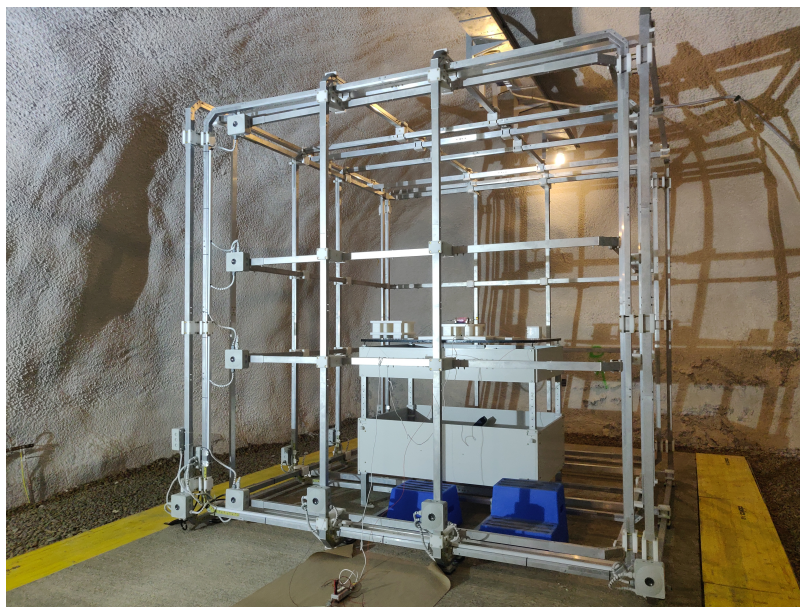

**Figure 5.** Picture of the Merritt coil system within the tunnel of the Conrad observatory. The side length of the cubic coil system is about 3 m. Each axis has two coil pairs with equal dimensions. This increases the homogeneity of the magnetic field and simplifies the handling of test setups.

coils). The Earth's magnetic field at COBS is about 21000 nT in the horizontal plane and the vertical component is about  
145 44000 nT. The second system applies the magnetic field vector  $B_{app}$  which is required for testing MAGSCA. The applied field  $B_{app}$  can be rotated electronically by software controlled current sources for measuring the heading characteristics as a function of the sensor angle  $\beta$ .

The entire compensation system includes the fluxgate based variometer of the observatory (located in a distance of about 300 m to the coil system), a set of current amplifiers and the compensation coils. The system is not able to compensate  
150 the Earth's magnetic field exactly to zero. A small and slightly inhomogeneous residual magnetic field  $B_{res}$  remains. The inhomogeneity is caused by a small and practically unavoidable deformation of the coils. Table 2 lists the inhomogeneities of the compensated magnetic field along the three coil axes. The individual field components of the residual field are in the order of several nT, this is known from measurements with a fluxgate sensor.

The maximum sensitive volume of the MAGSCA sensor unit is defined by the size of the cylindrical vapour cell, which has  
155 a diameter and a length of 2.54 cm. Thus, the inhomogeneities in the order of  $0.2 \text{ nT cm}^{-1}$  have a significant influence on the magnetic field strength measurements. The magnetic field strength is averaged along the laser light path within the cell, effectively reducing the sensitive volume within the sensor unit. The two operational parameters: laser bias current (which defines the laser light intensity) and vapour temperature, impact the absorption of the laser light along the pass, and with this, the weighting function of the averaging. Therefore, the exact influence of the inhomogeneity on the magnetic field measurement





**Table 2.** Inhomogeneities of the magnetic field produced by the compensation coils along the three coil axes. The data was measured with a fluxgate sensor by placing it in a -5, 0 and +5 cm grid along all three coil axes.

| Coil Axis | $\Delta B_x$ [nT cm <sup>-1</sup> ] | $\Delta B_y$ [nT cm <sup>-1</sup> ] | $\Delta B_z$ [nT cm <sup>-1</sup> ] |
|-----------|-------------------------------------|-------------------------------------|-------------------------------------|
| X         | +0.03                               | +0.18                               | -0.12                               |
| Y         | +0.18                               | -0.18                               | -0.08                               |
| Z         | -0.12                               | -0.09                               | +0.16                               |

160 is hard to assess. The inhomogeneities also require a precise placement of the sensor unit, within the centre of the coil system, to achieve reproducible measurements.

Table 3 lists the specifications of the Merritt coil system. The coil factors have been calibrated with an Overhauser magnetometer at large fields (> 20000 nT). The used Overhauser magnetometer (*GSM-90* from *GEM Systems*) has an accuracy of 0.1 nT. For low applied field strengths (< 1500 nT), the uncertainties of the coil factors result in an accuracy of the applied field below 0.01 nT. The coil current sources are *BE2811* from *ITEST*. The least significant bit of the current sources translates to a maximum error of 0.08 nT. Combined with the uncertainties of the coil factors for < 1500 nT, the maximum error of the accuracy of the applied magnetic fields is < 0.09 nT.

The non-orthogonality between the *X* and *Y* axes was experimentally determined to be  $(89.975 \pm 0.007)^\circ$  (Wilfinger). For the accuracy verification of MAGSCA, no magnetic fields were applied in the *Z* axis.

170 The heading characteristics were determined by a test routine consisting of four different sensor orientations. The four sensor orientations are required to separate the heading characteristics from the residual field  $B_{res}$ , as it will be explained in Sect. 3. A sensor orientation is defined by the pointing direction of the sensor axis in relation to the coils' coordinates. The sensor axis points along the sensor unit's cylinder axis away from the fibre connectors. In Fig. 6, the sensor axis is orientated in  $-Y$  direction. Table 4 lists the definition of all four sensor orientations. For the accuracy evaluation, measurements in all four sensor orientations were recorded right after each other to minimise drifts of the magnetic field within the coil system.

To evaluate the stability of the combined configuration of MAGSCA and the coil system, a magnetic field of 300 nT was applied in the *X* axis and was recorded for 10 h by MAGSCA (operational parameters: vapour temperature 25°C and laser bias current 2.14 mA). The standard deviation of the time series was below 0.04 nT. The recording for each heading characteristic took between 15 min and 20 min per sensor orientation, thus, the drift of the magnetic field strength can be neglected during one recording. Therefore, the noise and consequently the precision during the measurement of one heading characteristic is below 0.04 nT.

For each sensor orientation, the vapour cell and thus the illuminated volume covers a slightly different volume within the coil system. Therefore, a slightly different residual magnetic field strength is measured for each sensor orientation. This is caused by the field inhomogeneity in the order of 0.2 nT cm<sup>-1</sup> (table 2).

185 In the case where the rotation of the vapour cell is mechanically perfect and the cell always covers the same volume within the coil system, the magnetic field inhomogeneity of the residual field can be estimated: The sensitive volume (illuminated

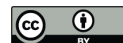

**Table 3.** Specifications of the double Merritt coil system at the Conrad observatory.

| Coil factors [nT mA <sup>-1</sup> ]               |                   |
|---------------------------------------------------|-------------------|
| coil <i>X</i>                                     | 14.66904 ± 0.0009 |
| coil <i>Y</i>                                     | 15.55858 ± 0.0013 |
| coil <i>Z</i>                                     | 16.53543 ± 0.0027 |
| Non-orthogonality                                 |                   |
| between axes <i>X</i> and <i>Y</i>                | (89.975 ± 0.007)° |
| Accuracy [nT] of <i>B<sub>app</sub></i> < 1500 nT |                   |
| least significant bit of current source           | <0.08             |
| uncertainty of coil factors                       | <0.01             |
| maximum error                                     | <0.09             |
| Precision [nT]                                    |                   |
| combined MAGSCA and coil                          | <0.04             |

**Table 4.** The definitions of the four sensor orientations within the Merritt coil system.

| Sensor Orientations | Coil Coordinates                 |
|---------------------|----------------------------------|
| 0°                  | Sensor axis points in + <i>X</i> |
| 90°                 | Sensor axis points in + <i>Y</i> |
| 180°                | Sensor axis points in − <i>X</i> |
| 270°                | Sensor axis points in − <i>Y</i> |

volume) within the vapour cell is about 2.5 cm along the sensor axis and about 2.0 cm perpendicular to the sensor axis. For a sufficiently large applied magnetic field, only the inhomogeneity in the applied magnetic field direction influences the measurement. For the sensor orientations 0° and 180°, the inhomogeneity is 0.08 nT in the axial +*X* direction and 0.36 nT  
 190 in the perpendicular +*Y* direction. For the sensor orientations 90° and 270°, the inhomogeneity is -0.46 nT in the axial +*Y* direction and 0.36 nT in the +*X* direction. These values can be used as an estimate of the impact of the different sensor orientations on the magnetic field measurement.

Within the sensor housing, the vapour cell is offset from the rotation axis (Fig. 6) by about 0.5 cm along the sensor axis. Thus, the influence of the different sensor orientations is increased. For the sensor orientations 0° and 180°, the impact of the  
 195 inhomogeneity is 0.10 nT in the axial +*X* direction and 0.36 nT in the perpendicular +*Y* direction. For the sensor orientations 90° and 270°, the impact of the inhomogeneity is -0.55 nT in the axial +*Y* direction and 0.36 nT in the perpendicular +*X* direction.

The MAGSCA flight model for the JUICE mission was tested with two different setups within the Merritt coil system: the MAGSCA stand-alone setup and the J-MAG integrated setup.

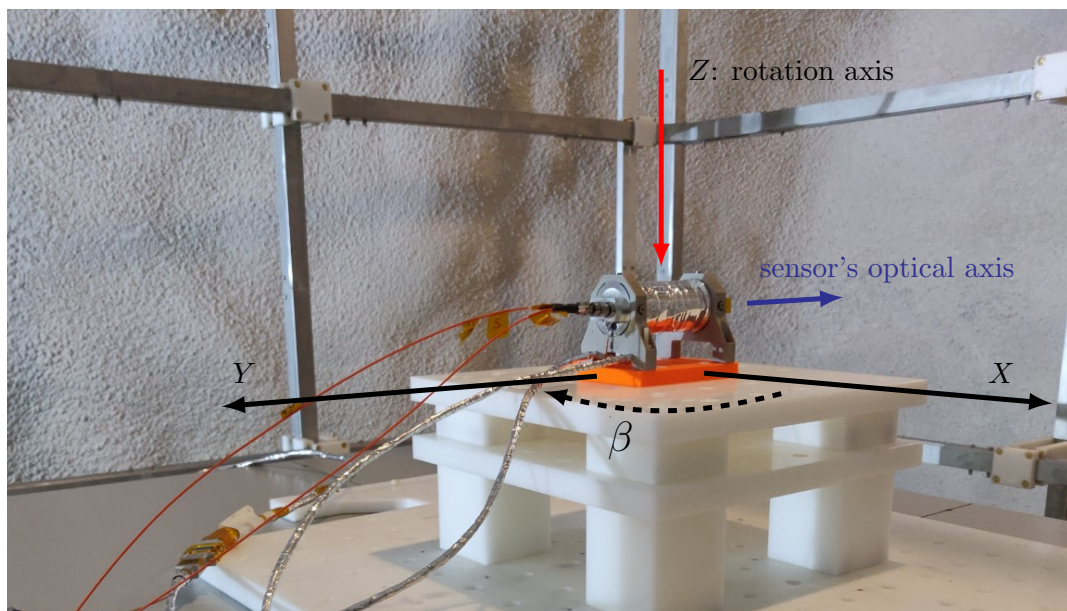

**Figure 6.** The MAGSCA sensor is placed within the Merritt coil system. The coil axes are marked. The red axis is the rotation axis of the applied magnetic field vector as well as the rotation axis for the four different sensor orientations used within the coil system. In the shown configuration, the sensor's optical axis points along the  $-Y$  coil axis direction (blue arrow).

200 In the MAGSCA stand-alone setup, the MAGSCA is controlled by the MAGSCA specific test hardware and software. This enables a fully automated execution of test sequences, which is supported by the Merritt coil system's remote-control capabilities, since the MAGSCA and the coil system can be simultaneously controlled by a custom made software. With this combined setup, fast and automated measurements of heading characteristics are possible. This setup was used for measurements at laser bias currents of 2.14, 2.65 and 3.39 mA, sensor temperatures of 25, 35 and 45°C and at an applied magnetic field strength of  
205 300 nT.

For the J-MAG integrated setup, the MAGSCA front-end electronics is installed within the J-MAG electronics box. The data communication is no longer handled with the MAGSCA specific test setup. In this configuration, the magnetic field vector rotation requires a manual interaction with the interface software of the Merritt coil system, which increases the testing time per heading characterisation. However, this is the flight configuration on board the JUICE spacecraft. The J-MAG integrated  
210 setup was used for measurements at a laser bias current of 2.14 mA and a sensor temperature of 25°C at applied magnetic field strengths of 300, 600 and 900 nT. For the J-MAG integrated setup an adapter plate was used to correct the vapour cell offset of 0.5 cm within the sensor unit along the optical path.

For both setups, the modulation frequency of the control loop for the microwave reference stabilisation was set to 919 Hz and the modulation frequency of the control loop for the magnetic field strength measurement was set to 337 Hz (Ellmeier  
215 et al.).



### 3 Data Processing Approach

The data processing approach aims to separate the heading characteristics from the effective magnetic field by fitting a mathematical model to the measured data (Amtmann, 2022). Simultaneously, it allows to determine a potential remanent magnetisation of the sensor unit. From the heading characteristics, the angular averaged accuracy and precision can be calculated to  
220 evaluate the performance of MAGSCA.

The approach follows the steps:

- Modelling of the effective magnetic field
- Creation of a fit function and the reduction of fit parameters
- Measurements at four different sensor orientations and fitting of data
- 225 – Evaluation of remanent magnetisation of the sensor unit
- Calculation of angular averaged accuracy and precision

#### Model of Effective Magnetic Field

The instrument measures the sum of its heading characteristics  $B_{head}$  and the effective magnetic field strength

$$B_{meas} = B_{head} + |B_{eff}| \quad . \quad (4)$$

230 The effective magnetic field  $B_{eff}$  is determined by the sum of the applied field  $B_{app}$  and the residual field  $B_{res}$

$$B_{eff} = B_{app} + B_{res} \quad . \quad (5)$$

Thus, the heading characteristics are calculated by

$$B_{head} = B_{meas} - |B_{app} + B_{res}| \quad . \quad (6)$$

For calculating the heading characteristics, the applied and the residual field have to be known.

235 For the accuracy verification, the applied magnetic field is rotated around the  $Z$ -axis by the Merritt coil system (Fig. 6). This rotational behaviour (rotating vector) can be expressed by

$$B_{app} = \begin{pmatrix} a_X \cos \beta + b_Y \sin \beta \\ a_Y \sin \beta + b_X \cos \beta \\ 0 \end{pmatrix} \quad . \quad (7)$$

The parameters  $a_X$  and  $a_Y$  are the maxima of the applied field strengths in the  $X$  and  $Y$  directions, which are characterized by their respective coil factors, and  $\beta$  represents the field direction in the  $X$ - $Y$  plane. The angle  $\beta$  corresponds to the sensor  
240 angle introduced in Sect. 1.1.  $b_X$  and  $b_Y$  describe the influences of the non-orthogonality between the  $X$  and  $Y$  axes of the



coil system on the applied field  $B_{app}$ . The non-orthogonality of the coil's  $Z$ -axis is not considered, since no field was applied along this axis.

By adding the residual field to the applied field, the effective field becomes

$$\mathbf{B}_{eff} = \begin{pmatrix} B_x + a_X \cos \beta + b_Y \sin \beta \\ B_y + a_Y \sin \beta + b_X \cos \beta \\ B_z \end{pmatrix} . \quad (8)$$

245 The scalar magnetometer measures the magnetic field strength, therefore, the absolute amplitude is of interest. The squared norm is

$$\begin{aligned} |\mathbf{B}_{eff}|^2 &= B_x^2 + 2B_x a_X \cos \beta + 2b_Y B_x \sin \beta + a_X^2 \cos^2 \beta + 2a_X b_Y \cos \beta \sin \beta + b_Y^2 \sin^2 \beta \\ &+ B_y^2 + 2B_y a_Y \sin \beta + 2b_X B_y \cos \beta + a_Y^2 \sin^2 \beta + 2a_Y b_X \cos \beta \sin \beta + b_X^2 \cos^2 \beta \\ &+ B_z^2 + 2B_z a_X \cos \beta . \end{aligned} \quad (9)$$

### Fit Function and Reduction of Fit Parameters

250 The individual field components of the residual field are of the order of several nT. However, their exact values are not known and thus, the effective magnetic field can not simply be removed from the measured magnetic field strength  $B_{meas}$  (see Sect. 2). The effective field can be determined by fitting the measured magnetic field strength  $B_{meas}$  with equation 9. This equation is simplified by using  $2 \cos \beta \sin \beta = \sin(2\beta)$  and  $\sin^2 \beta = 1 - \cos^2 \beta$ .

With the coefficients

$$k_1 = B_x^2 + B_y^2 + B_z^2 + b_Y^2 + a_Y^2 \quad (10)$$

$$255 \quad k_2 = 2B_x a_X + 2B_y b_X \quad (11)$$

$$k_3 = 2B_x b_Y + 2B_y a_Y \quad (12)$$

$$k_4 = a_X^2 + b_X^2 - b_Y^2 - a_Y^2 \quad (13)$$

$$k_5 = a_X b_Y + b_X a_Y \quad (14)$$

the fit function becomes

$$260 \quad f_{coil}(\beta, \mathbf{k}) = \sqrt{k_1 + k_2 \cos \beta + k_3 \sin \beta + k_4 \cos^2 \beta + k_5 \sin(2\beta)} . \quad (15)$$

The residual field component  $B_z$  appears only independently in  $k_1$ . For the fit routine, this factor will be interpreted as variable offset and will be treated accordingly: Some offset of the heading characteristics is "put" in  $B_z$  by the fit routine. This must be avoided for the correct evaluation of the angular averaged accuracy  $\overline{AE}$ . To prevent this, the parameter  $B_z$  is removed. This is a valid approximation, because  $B_z$  is small compared to  $a_Y^2$  and will not change  $k_1$  significantly.

265 For example, an applied magnetic field of  $\mathbf{B}_{app} = (300, 0, 0)$  and a residual field of  $\mathbf{B}_{res} = (0, 0, 1)$  result, for orthogonal coils, in the magnitude of 300.002 nT. For an applied field in the  $X$ - $Y$  direction, a small residual field in  $Z$  has nearly no impact on the magnetic field strength measured by the scalar magnetometer.



Several additional assumptions are made to reduce the number of fit parameters in  $f_{coil}(\beta, \mathbf{k})$ :

The fit parameters  $b_X$  and  $b_Y$  are determined by the non-orthogonality between the  $X$  and  $Y$  coils and therefore, they are considered the same ( $b_X = b_Y = b$ ). For applied magnetic fields  $< 2000$  nT the approximation  $a_X = a_Y = a$  can be made. The coil's accuracies are high (see Table 3), thus,  $a = a_{fix}$  is set to the fixed value for the applied magnetic field strength.

To summarise, the reduced coefficients become

$$k_1 = B_x^2 + B_y^2 + b^2 + a_{fix}^2 \quad (16)$$

$$k_2 = 2B_x a_{fix} + 2B_y b \quad (17)$$

$$k_3 = 2B_x b + 2B_y a_{fix} \quad (18)$$

$$k_4 = 0 \quad (19)$$

$$k_5 = 2a_{fix} b \quad (20)$$

### Measurement at four Different Sensor Orientations and Fitting of Data

A robust separation of  $B_{eff}$  (coil driven) and  $B_{head}$  (MAGSCA driven) is of interest. This is achieved by a successive 90° rotation of the sensor unit within the coil system with recordings of  $B_{meas}$  where the applied magnetic field is rotated around  $Z$  for each sensor orientation. The coil's effective field  $B_{eff}$  does not change while the heading characteristic  $B_{head}$  is phase shifted by 90° relative to  $B_{eff}$  for each sensor orientation. These individual phase shifts for  $\beta$  are added to the fit functions. The sensor orientations used for this approach are listed in Table 4.

As discussed in Sect. 2, each sensor orientation has a slightly different residual field. This has to be taken into account during fitting. Four sets of residual field fit parameters ( $B_x^{SO}, B_y^{SO}$  with  $SO \in \{0^\circ, 90^\circ, 180^\circ, 270^\circ\}$ ) are applied to the fit function  $f_{coil}$  of equation 15.

For a given set of operational parameters, all heading characteristics (measured at the four sensor orientations) are fitted with the parameter  $b$ , while each sensor orientation has its own fit parameters for their respective residual field ( $B_x^{SO}, B_y^{SO}$ ).

### Evaluation of Remanent Magnetisation of the Sensor Unit

The fit gives four residual fields. If the differences between these fields are larger than the expected inhomogeneity, a remanent magnetisation of the sensor unit is probable. In this case, the fit interprets the magnetisation as a residual magnetic field within the coil system, and the variations of the fitted residual field become larger than the inhomogeneities within the coil system.

A sensor unit with a remanent magnetisation can only be reasonably fitted with a single residual field for all four sensor orientations to extract the heading characteristics.

### Calculation of Accuracy and Precision

From the measured data for both coupled CPT resonances and the fit results, the angular averaged accuracy



$$\overline{AE}_{MAGSCA} = \sum_{\beta}^n \frac{B_{meas,\beta} - B_{eff,\beta}}{n} \quad (21)$$

is calculated. The angular averaged precision  $\overline{P}_{MAGSCA}$  is the corresponding standard deviation.

The total angular averaged accuracy  $\overline{AE}_{tot}$  and total angular averaged precision  $\overline{P}_{tot}$  not only depend on MAGSCA, but also  
 300 on the accuracy and precision of the reference magnetic field strength  $B_{eff}$ , produced by the Merritt coil system (Table 3). The  
 total angular averaged accuracy, including the accuracy of the Merritt coil system  $\overline{AE}_{coil}$ , is

$$\overline{AE}_{tot} = \sqrt{\overline{AE}_{MAGSCA}^2 + \overline{AE}_{coil}^2} \quad (22)$$

The total precision, including the precision of the Merritt coil system  $\overline{P}_{coil}$ , is

$$\overline{P}_{tot} = \sqrt{\overline{P}_{MAGSCA}^2 + \overline{P}_{coil}^2} \quad (23)$$

#### 305 4 Verification Tests and Results

In the course of the evaluation of the accuracy and precision of MAGSCA, several sets of operational parameters were investigated. One set of operational parameters consists of a laser bias current, a sensor temperature and an applied magnetic field strength. For each set of operational parameters and for each sensor orientation, the applied magnetic field was rotated and recorded.

310 The operational parameters as well as the fit results for calculating the effective field  $B_{eff}$  are listed for the MAGSCA stand-alone setup in Table 6 and for the J-MAG integrated setup in Table 7.

For the measurements at the sensor temperatures of 35°C and 45°C (Table 6), only three sensor orientations are listed. During the data recording of the missing sensor orientations, an error occurred and thus, the measurements had to be removed. This increases the uncertainty of the fitted residual fields and, consequently, of the calculated heading characteristics.

315 **A remanent magnetisation of the sensor unit does not depend on the selected set of operational parameters**, thus, only fit results for all four sensor orientations are considered for the evaluation of a potential sensor magnetisation. At the laser bias current of 2.14 mA (Tables 6 and 7), the standard deviations  $\Delta B_i$  of both components of the residual fields are in the order of 0.10 nT. These variations are similar or smaller than the expected impact of the inhomogeneities on the magnetic field strength measurement (Sect. 2). Thus, it can be concluded, that the MAGSCA sensor unit does not have a residual magnetisation larger  
 320 than 0.10 nT. Additionally, the adapter plate, used for the spatial correction of the vapour cell offset, reduces the variations of the residual fields in the J-MAG integrated setup.

From the  $a_{fix}$  and  $b$  parameters of Tables 6 and 7 the mean non-orthogonality angle was calculated as  $(89.995 \pm 0.002)^\circ$ . A small deviation is found, compared to the measured non-orthogonality angle of  $(89.975 \pm 0.007)^\circ$ . This can be explained by  
 325 **the uncertainty of the here presented data processing** approach and/or by a possible change in the deformation of the Merritt coil system between the time of the experimental determination of the non-orthogonality and the time of the verification of MAGSCA.



**Table 5.** Angular averaged accuracy and angular averaged precision of MAGSCA on board JUICE. The total angular averaged accuracy  $\overline{AE}_{tot}$  and the total angular averaged precision  $\overline{P}_{tot}$  considers the accuracy and precision of the Merritt coil system, used for applying the reference magnetic field. The operational parameters are the laser bias current (LC), the vapour temperature (VT) and the applied magnetic field strength  $B_{app}$ .  $\overline{AE}_{tot}$  and  $\overline{P}_{tot}$  were rated according to the classification introduced in Table 1.

| $B_{app}$ [nT]           | LC [mA] | VT [°C] | $\overline{AE}_{MAGSCA}$ [nT] | $\overline{P}_{MAGSCA}$ [nT] | $\overline{AE}_{tot}$ [nT] | $\overline{P}_{tot}$ [nT] | Rating |
|--------------------------|---------|---------|-------------------------------|------------------------------|----------------------------|---------------------------|--------|
| MAGSCA stand-alone setup |         |         |                               |                              |                            |                           |        |
| 300                      | 2.14    | 25      | -0.07                         | 0.10                         | 0.12                       | 0.11                      | B      |
| 300                      | 2.65    | 25      | -0.15                         | 0.14                         | 0.18                       | 0.15                      | B      |
| 300                      | 3.39    | 25      | -0.15                         | 0.29                         | 0.18                       | 0.30                      | C      |
| 300                      | 2.65    | 35      | -0.11                         | 0.14                         | 0.11                       | 0.15                      | B      |
| 300                      | 2.65    | 45      | -0.15                         | 0.22                         | 0.18                       | 0.23                      | C      |
| J-MAG integrated setup   |         |         |                               |                              |                            |                           |        |
| 300                      | 2.14    | 25      | -0.04                         | 0.07                         | 0.10                       | 0.08                      | A      |
| 900                      | 2.14    | 25      | -0.04                         | 0.06                         | 0.10                       | 0.07                      | A      |
| 1500                     | 2.14    | 25      | -0.03                         | 0.07                         | 0.10                       | 0.08                      | A      |

The results of Tables 6 and 7 were used to subtract the applied magnetic field from the measured data to extract the heading characteristics. In order to have a clear visualisation of each set of operational parameters, combined heading characteristics were determined. Therefore, the mean value of the four heading characteristics was calculated for each sensor angle, as well as their standard deviation. Thus, the presented Fig. 4 and 7 show the combined heading characteristics for the respective sets of operational parameters.

The variations of the residual fields at the high laser bias current of 3.39 mA seen in Table 6 is mainly driven by the notable deviation of the residual field at the sensor orientation of 0°. This also explains the larger error bars of the combined heading characteristics in Fig. 4 for the laser bias current of 3.39 mA.

The heading characteristics were used to calculate the angular averaged accuracy  $\overline{AE}_{MAGSCA}$  and the angular averaged precision  $\overline{P}_{MAGSCA}$ . The accuracy and precision of the Merrit coil system (Table 3) was considered by equation 22 and 23 to determine the total angular averaged accuracy and total angular averaged precision. All results are found in Table 5 and are rated according to the classification of Table 1.

Figure 7 depicts the heading characteristics for the laser bias current of 2.14 mA, the sensor temperature of 25°C and the applied magnetic field strength of 300 nT. The figure shows that the stand-alone setup as well as the J-MAG integrated setup result in heading characteristics with the same angular behaviour. This set of operational parameters satisfies the performance requirements and is rated with A for the J-MAG integrated setup (Table 1). It is the most suitable set of investigated operational parameters for MAGSCA. No additional correction of the data is required to comply with the required performance for the JUICE missions. Table 5 shows that the stand-alone as well as the integrated setups result in comparable angular averaged



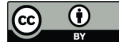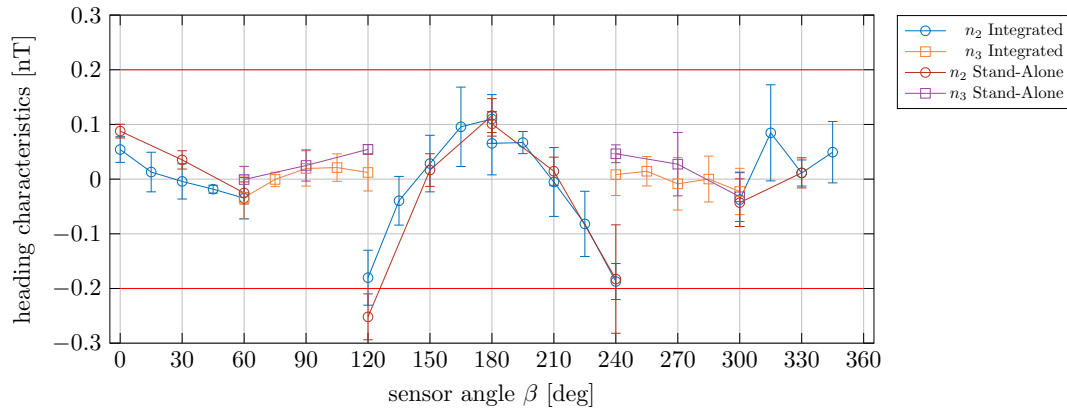

**Figure 7.** Heading characteristics  $B_{head}$  of the  $n_2$  and  $n_3$  coupled CPT resonances measured with the MAGSCA stand-alone setup and the J-MAG integrated setup. Operational parameters: bias current 2.14 mA; sensor cell temperature is  $25^\circ\text{C}$  at  $B_{app} = 300$  nT. Each data point is the mean value of four separate measurements at four different sensor orientations, and the error bars are the corresponding standard deviations. The fit parameters for calculating the effective field  $B_{eff}$  can be found in Tables 6 and 7. The accuracy requirement 0.2 nT ( $1-\sigma$ ) of the JUICE mission is added as red horizontal lines.

345 accuracies and angular averaged precisions. Thus, the performance of the stand-alone setup can be expected in flight for the other sets of operational parameters.

The applied magnetic field strength, in the tested magnetic field range (300-1500 nT), does not impact the accuracy and precision of MAGSCA.

350 A higher laser bias current has a negative effect on the accuracy and precision. The ratings for the measurements at the sensor temperatures  $35$  and  $45^\circ\text{C}$  are impacted by the lack of a fourth sensor orientation, however, it is concluded, that a higher vapour temperature results in a lower rating.

The accuracy of MAGSCA below the ambient magnetic field strength of 300 nT is discussed in the separate publication *Ellmeier et. al. Lower Magnetic Field Measurement Limit of the Coupled Dark State Magnetometer* (Ellmeier et al.).

## 5 Summary and Conclusion

355 This paper reports the pre-flight verification of the accuracy and precision of the magnetic field strength measurement of the scalar magnetometer (MAGSCA) on board ESA's Jupiter Icy Moon Explorer (JUICE) mission. The performance was evaluated with a double Merritt coil system at the Conrad Observatory in Lower Austria.

360 The deficiencies of the applied test field and MAGSCA's heading characteristics were separated by measurements with four dedicated sensor orientations and by fitting a mathematical model to the measured data. The heading characteristics describe variations of the magnetic field strength measurement from a reference magnetic field strength as a function of the angle

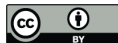

**Table 6.** Fit parameter for the calculation of  $B_{eff}$  for the MAGSCA stand-alone setup within the Merritt coil system. The fit results were used to determine the heading characteristics at various laser bias currents (LC) and vapour temperatures (VT).  $a_{fix}$  is the applied magnetic field strength and  $b$  the impact of the non-orthogonality. The residual fields are listed as  $B_x$  and  $B_y$  for each sensor orientation (SO). The mean values  $\bar{B}_i$  as well as their standard deviations  $\Delta B_i$  were calculated for each component of the residual magnetic fields. Due to errors in the data recording, the sensor orientations  $90^\circ$  at  $35^\circ\text{C}$  vapour temperature and the sensor orientation  $180^\circ$  at  $45^\circ\text{C}$  vapour temperature had to be removed from the data evaluation.

| LC[mA] | VT [ $^\circ\text{C}$ ] | $a_{fix}$ [nT] | $b$ [nT] | SO                         | $B_x$ [nT] | $B_y$ [nT] |
|--------|-------------------------|----------------|----------|----------------------------|------------|------------|
| 2.14   | 25                      | 300            | 0.02     | $0^\circ$                  | 3.18       | 2.60       |
|        |                         |                |          | $90^\circ$                 | 2.96       | 2.33       |
|        |                         |                |          | $180^\circ$                | 3.05       | 2.48       |
|        |                         |                |          | $270^\circ$                | 3.02       | 2.61       |
|        |                         |                |          | $\bar{B}_i \pm \Delta B_i$ |            |            |
| 2.65   | 25                      | 300            | 0.03     | $0^\circ$                  | 3.18       | 2.51       |
|        |                         |                |          | $90^\circ$                 | 2.96       | 2.31       |
|        |                         |                |          | $180^\circ$                | 2.87       | 2.30       |
|        |                         |                |          | $270^\circ$                | 3.03       | 2.44       |
|        |                         |                |          | $\bar{B}_i \pm \Delta B_i$ |            |            |
| 3.39   | 25                      | 300            | 0.01     | $0^\circ$                  | 3.10       | 2.36       |
|        |                         |                |          | $90^\circ$                 | 2.64       | 2.28       |
|        |                         |                |          | $180^\circ$                | 2.50       | 2.20       |
|        |                         |                |          | $270^\circ$                | 2.63       | 2.26       |
|        |                         |                |          | $\bar{B}_i \pm \Delta B_i$ |            |            |
| 2.65   | 35                      | 300            | 0.03     | $0^\circ$                  | 3.38       | 2.77       |
|        |                         |                |          | $180^\circ$                | 3.37       | 2.33       |
|        |                         |                |          | $270^\circ$                | 3.46       | 2.66       |
|        |                         |                |          | $\bar{B}_i \pm \Delta B_i$ |            |            |
| 2.65   | 45                      | 300            | 0.02     | $0^\circ$                  | 2.68       | 2.75       |
|        |                         |                |          | $90^\circ$                 | 2.66       | 2.18       |
|        |                         |                |          | $270^\circ$                | 3.15       | 2.88       |
|        |                         |                |          | $\bar{B}_i \pm \Delta B_i$ |            |            |



**Table 7.** Fit parameter for the calculation of  $B_{eff}$  for the J-MAG integrated setup within the Merritt coil system. The fit results were used to determine the heading characteristics at various laser bias currents (LC) and vapour temperatures (VT).  $a_{fix}$  is the applied magnetic field strength and  $b$  the impact of the non-orthogonality. The residual fields are listed as  $B_x$  and  $B_y$  for each sensor orientation (SO). The mean values  $\bar{B}_i$  as well as their standard deviations  $\Delta B_i$  were calculated for each component of the residual magnetic fields. The variations of the residual fields are smaller compared to the MAGSCA stand-alone setup due to the compensation of the vapour cell offset by the adapter plate.

| LC[mA]                     | VT [°C] | $a_{fix}$ [nT] | $b$ [nT] | SP   | $B_x$ [nT]       | $B_y$ [nT]       |
|----------------------------|---------|----------------|----------|------|------------------|------------------|
| 2.14                       | 25      | 300            | 0.04     | 0°   | -1.05            | -0.23            |
|                            |         |                |          | 90°  | -0.82            | -0.15            |
|                            |         |                |          | 180° | -0.96            | -0.08            |
|                            |         |                |          | 270° | -0.86            | -0.09            |
| $\bar{B}_i \pm \Delta B_i$ |         |                |          |      | $-0.92 \pm 0.10$ | $-0.13 \pm 0.07$ |
| 2.14                       | 25      | 900            | 0.09     | 0°   | -0.85            | -0.20            |
|                            |         |                |          | 90°  | -0.78            | -0.17            |
|                            |         |                |          | 180° | -0.80            | -0.05            |
|                            |         |                |          | 270° | -0.85            | -0.19            |
| $\bar{B}_i \pm \Delta B_i$ |         |                |          |      | $-0.82 \pm 0.04$ | $-0.15 \pm 0.08$ |
| 2.14                       | 25      | 1500           | 0.15     | 0°   | -0.78            | -0.13            |
|                            |         |                |          | 90°  | -0.66            | -0.08            |
|                            |         |                |          | 180° | -0.73            | 0.03             |
|                            |         |                |          | 270° | -0.77            | -0.13            |
| $\bar{B}_i \pm \Delta B_i$ |         |                |          |      | $-0.74 \pm 0.06$ | $-0.08 \pm 0.08$ |

between the sensor axis and the applied magnetic field vector. It was found, that the accuracy and precision of MAGSCA are determined by the heading characteristics, which, in turn, depend on the selected set of operational parameters.

It was shown, that the operation of the magnetometer at a laser bias current of 2.14 mA and a sensor temperature of 25°C do not require additional data correction to comply with the accuracy requirement of 0.2 nT (1- $\sigma$ ) for the JUICE mission.

365 During the long time in space, the instrument’s optical components will experience radiation induced attenuation. To counteract this, the instrument will be operated at higher laser bias currents and at higher sensor temperatures. Thus, the performance of the instrument has to be understood for these operational parameters.

The applied magnetic field strength does not have an impact on the accuracy and precision of MAGSCA in the tested range of 300 to 1500 nT. No measurable residual magnetisation of the sensor unit was found. A comparison of the stand-alone setup and the integrated setup shows that the same result as measured with the stand-alone setup can be expected for MAGSCA  
370 during the JUICE mission.



In a future publication, we will discuss the impact of radiation induced attenuation within the optical path on the performance of the scalar magnetometer on JUICE as well as the in-flight tracking of this attenuation.

*Data availability.* The data that support the findings of this study are available from the corresponding authors upon reasonable request.

375 *Author contributions.* C. Amtmann prepared the manuscript with contributions from P. Brown, W. Magnes, Michele Dougherty, E. Ellmeier and R. Lammegger. The experiments were designed by C. Amtmann, A. Betzler, R. Lammegger, W. Magnes, A. Pollinger and J. Wilfinger, and were carried out by C. Amtmann, A. Betzler, R. Baughen and A. Strickland. The MAGSCA flight hardware was build by A. Pollinger, C. Hagen, M. Agú, C. Amtmann, A. Betzler, R. Lammegger and I. Jernej.

*Competing interests.* The authors declare that they have no conflict of interest.

380 *Acknowledgements.* The authors are grateful for financial support from the Austrian Space Applications Programme (Grant No. 840122 and 873688) of the Austrian Research Promotion Agency and the PRODEX Programme of the European 450 Space Agency (Grant No. 4000114669).

The investigation of the heading characteristics and the therewith linked understanding of the handling of the double Merritt coil systems plays an important role in the investigation of a novel vector magnetometer concept. This novel approach is based on the Coupled Dark State  
385 Magnetometer and is currently in development, which is funded by the *1,000 Ideas Programme* of the Austrian Science Fund (FWF) with the grant ref: TAI 823. For open access purposes, the author has applied a CC BY public copyright license to any author accepted manuscript version arising from this submission.

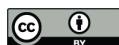

## References

- JUICE definition study report (Red Book), European Space Agency, <https://sci.esa.int/s/wRdzyl8>, 2014.
- 390 Acuña, M. H.: Space-based magnetometers, *Review of Scientific Instruments*, 73, 3717–3736, <https://doi.org/10.1063/1.1510570>, 2002.
- Amtmann, C.: Heading Characteristics of the Coupled Dark State Magnetometer and their Sources, Ph.D. thesis, Graz University of Technology, 2022.
- Amtmann, C., Lammegger, R., Betzler, A., Agú, M., Ellmeier, M., Hagen, C., Jernej, I., Magnes, W., Pollinger, A., and Ernst, W. E.: Experimental and theoretical investigations on the modulation capabilities of a sample of vertical cavity surface emitting laser diodes for atomic vapour applications, *Applied Physics B*, 129, <https://doi.org/https://doi.org/10.1007/s00340-023-07971-7>, 2023.
- 395 Arce, A. and Rodriguez, D.: Juice Magnetometer Boom Subsystem, in: Proc. 18. European Space Mechanisms and Tribology Symposium 2019, Munich, Germany, 18.-20. September 2019, <https://esmats.eu/esmatspapers/pastpapers/pdfs/2019/arce.pdf>, 2019.
- Arimondo, E.: V Coherent Population Trapping in Laser Spectroscopy, *Progress in Optics*, 35, 257–354, [https://doi.org/10.1016/S0079-6638\(08\)70531-6](https://doi.org/10.1016/S0079-6638(08)70531-6), 1996.
- 400 Auster, H.-U.: How to measure earth’s magnetic field, *Physics Today*, 61, 76–77, <https://doi.org/10.1063/1.2883919>, 2008.
- Bjorklund, G. C., Levenson, M. D., Lenth, W., and Ortiz, C.: Frequency modulation (FM) spectroscopy, *Applied Physics B: Lasers and Optics*, 32, 145–152, <https://doi.org/10.1007/BF00688820>, 1983.
- Ellmeier, M., Betzler, A., Amtmann, C., Pollinger, A., Hagen, C., Jernej, I., Agú, M., Magnes, W., Lammegger, R., Baughen, R., Brown, P., and Dougherty, M.: Lower Magnetic Field Measurement Limit of the Coupled Dark State Magnetometer, publication of article in preparation.
- 405 Ellmeier, M., Amtmann, C., Pollinger, A., Magnes, W., Hagen, C., Betzler, A., Jernej, I., Agú, M., Windholz, L., and Lammegger, R.: Frequency shift compensation for single and dual laser beam pass sensors of a coherent population trapping resonance based coupled dark state magnetometer, *Measurement: Sensors*, 25, 100606, <https://doi.org/https://doi.org/10.1016/j.measen.2022.100606>, 2023.
- Grasset, O., Dougherty, M. K., Coustenis, A., Bunce, E. J., Erd, C., Titov, D., Blanc, M., Coates, A., Drossart, P., Fletcher, L. N., Hussmann, H., Jaumann, R., Krupp, N., Lebreton, J. P., Prieto-Ballesteros, O., Tortora, P., Tosi, F., and Van Hoolst, T.: JUPITER ICy moons Explorer (JUICE): An ESA mission to orbit Ganymede and to characterise the Jupiter system, *Planetary and Space Science*, 78, 1–21, <https://doi.org/10.1016/j.pss.2012.12.002>, 2013.
- Lammegger, R.: Method and device for measuring magnetic fields; Patent WO/2008/151344, 2008.
- Levi, F., Godone, A., and Vanier, J.: The Light Shift Effect in the Coherent Population Trapping Cesium Maser, 47, 466, <https://doi.org/10.1109/58.827437>, 2000.
- 415 Merayo, J. M. G., Brauer, P., Primdahl, F., Petersen, J. R., and Nielsen, O. V.: Scalar calibration of vector magnetometers, *Measurement Science and Technology*, 11, 120–132, <https://doi.org/10.1088/0957-0233/11/2/304>, 2000.
- Pollinger, A., Lammegger, R., Magnes, W., Ellmeier, M., Baumjohann, W., and Windholz, L.: Control loops for a Coupled Dark State Magnetometer, in: 2010 IEEE Sensors, IEEE, <https://doi.org/10.1109/icsens.2010.5690766>, 2010.
- 420 Pollinger, A., Ellmeier, M., Magnes, W., Hagen, C., Baumjohann, W., Leitgeb, E., and Lammegger, R.: Enable the inherent omnidirectionality of an absolute coupled dark state magnetometer for e.g. scientific space applications, 2012 IEEE I2MTC - International Instrumentation and Measurement Technology Conference, Proceedings, pp. 33–36, <https://doi.org/10.1109/I2MTC.2012.6229247>, 2012.



- Pollinger, A., Lammegger, R., Magnes, W., Hagen, C., Ellmeier, M., Jernej, I., Leichtfried, M., Kürbisch, C., Maierhofer, R., Wallner, R., Fremuth, G., Amtmann, C., Betzler, A., Delva, M., Prattes, G., and Baumjohann, W.: Coupled dark state magnetometer for the China Seismo-Electromagnetic Satellite, *Measurement Science and Technology*, 29, <https://doi.org/10.1088/1361-6501/aacde4>, 2018.
- 425 Pollinger, A., Amtmann, C., Betzler, A., Cheng, B., Ellmeier, M., Hagen, C., Jernej, I., Lammegger, R., Zhou, B., and Magnes, W.: In-orbit results of the Coupled Dark State Magnetometer aboard the China Seismo-Electromagnetic Satellite, *Geoscientific Instrumentation, Methods and Data Systems*, 9, 275–291, <https://doi.org/10.5194/gi-9-275-2020>, 2020.
- Report, D. S.: JUICE JUPiter ICy moons Explorer Exploring the emergence of habitable worlds around gas giants, <https://sci.esa.int/web/juice/-/54994-juice-definition-study-report>, 2014.
- 430 Ripka, P.: Advances in fluxgate sensors, *Sensors and Actuators A: Physical*, 106, 8–14, [https://doi.org/10.1016/s0924-4247\(03\)00094-3](https://doi.org/10.1016/s0924-4247(03)00094-3), 2003.
- Steck, D. A.: Rubidium 87 D Line Data, <http://steck.us/alkalidata>, available online (revision 1.6, 14. October 2003), 2003.
- Vanier, J. and Audoin, C.: *The Quantum Physics of Atomic Frequency Standards*, IOP Publishing, <https://doi.org/10.1201/9781003041085>, 1989.
- 435 Vanier, J., Godone, A., and Levi, F.: Coherent population trapping in cesium: Dark lines and coherent microwave emission, *Physical Review A*, 58, 2345–2358, <https://doi.org/10.1103/physreva.58.2345>, 1998.
- Wilfinger, J.: Homogeneity Imperfections Analysis of a Merritt Coil System, master Thesis, Graz University of Technology. Publication of thesis in preparation.
- 440 Wynands, R. and Nagel, A.: Precision spectroscopy with coherent dark states, vol. 68, pp. 1–25, Springer Science and Business Media LLC, <https://doi.org/https://doi.org/10.1007/s003400050581>, 1999.
